# Supplementary material for: A terahertz absorption spectroscopy study of structural changes in d-penicillaminato CuI8CuII6 clusters induced by water desorption
Source: Royal Society of Chemistry journal article supplement (doi:10.1039/c5qi00207a), 2015-12-08
Supplement: c5qi00207a1.pdf [file c5qi00207a1.pdf]

Electronic Supplementary Information

Terahertz absorption spectroscopy study of structural changes in D-penicillaminato  $\text{Cu}^{\text{I}}_8\text{Cu}^{\text{II}}_6$  clusters induced by water desorption

Hal Suzuki,\* Chiko Otani, Nobuto Yoshinari and Takumi Konno

Table of Contents

Schematic view of the crystal structures for crystals **1**, **2** and **3**. S1

Terahertz spectra of  $[\text{Co}(\text{H}_2\text{O})_6]\text{Cl}_2$ , D-penicillamine,  $\text{K}[\text{Co}(\text{D-pen})_2] \cdot 1.5\text{H}_2\text{O}$ , and crystals **1**, **2** and **3**. S2

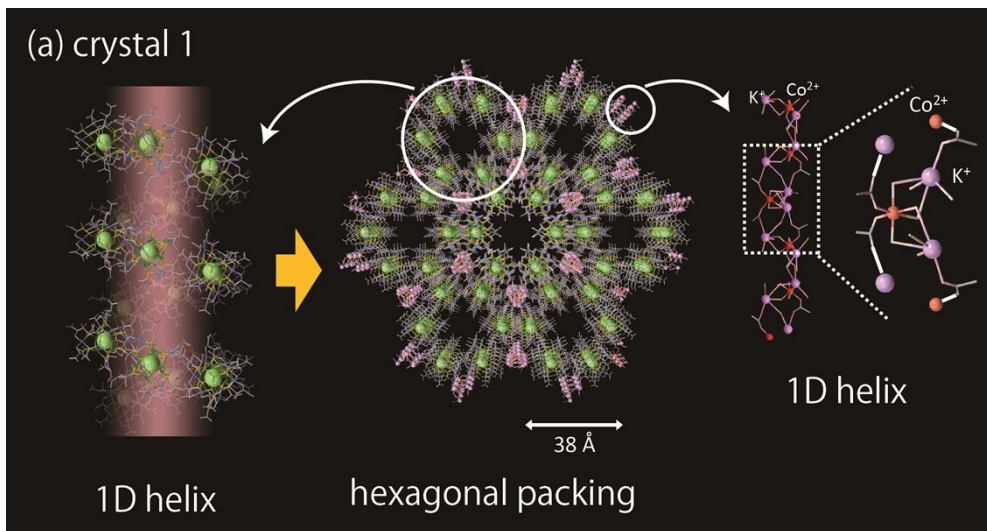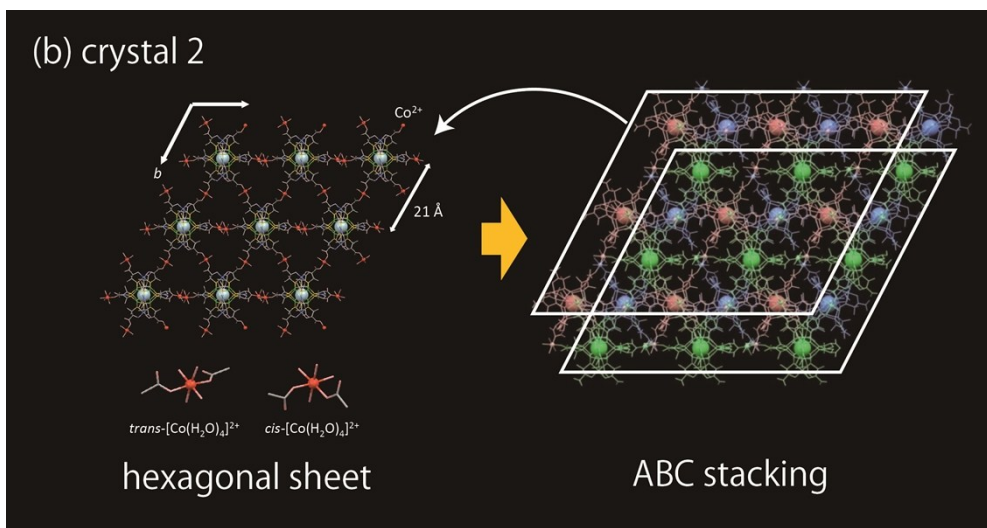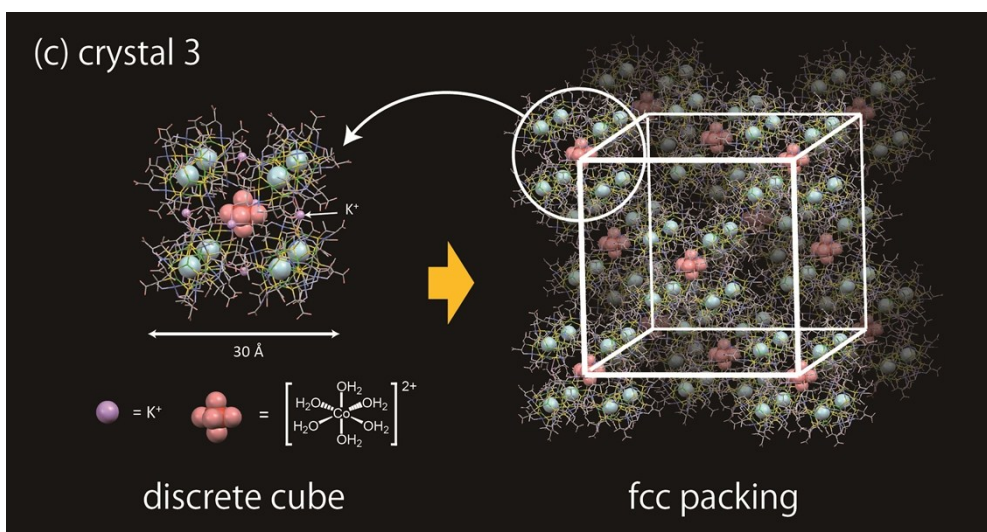

Figure S1 Schematic view of the crystal structures for crystals **1**, **2** and **3**.

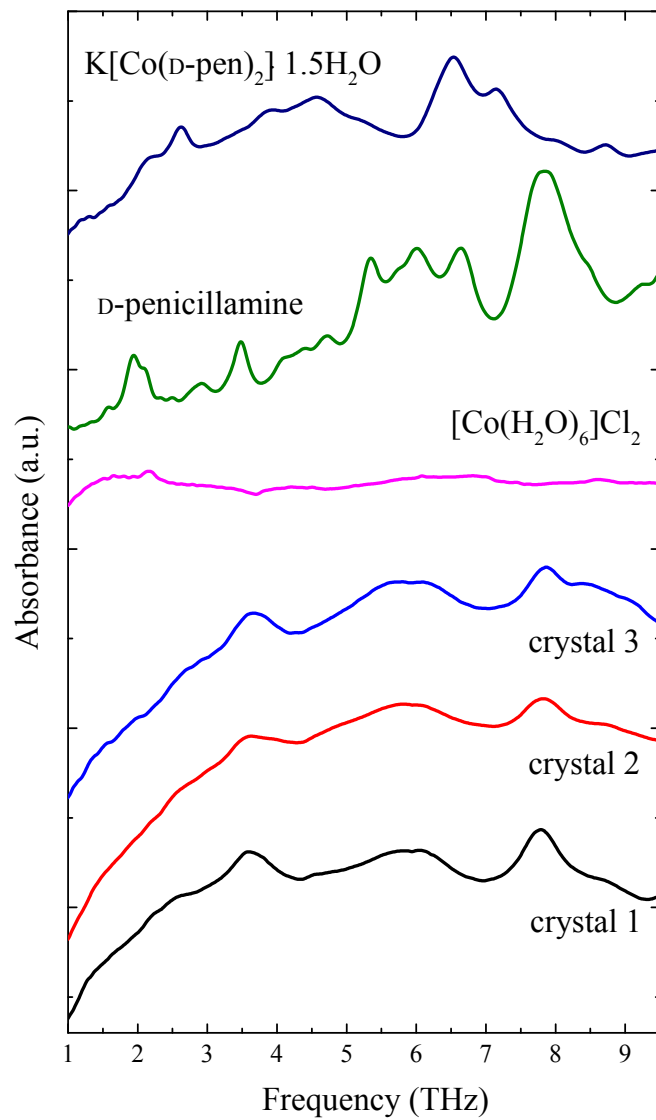

Figure S2 Terahertz spectra of  $[\text{Co}(\text{H}_2\text{O})_6]\text{Cl}_2$ , D-penicillamine,  $\text{K}[\text{Co}(\text{D-pen})_2] \cdot 1.5\text{H}_2\text{O}$ , and crystals **1**, **2** and **3**.
